# Supplementary material
Source: MDPI journal article supplement (https://www.mdpi.com/1999-4907/9/12/752)
Supplement: s1 [file s1]

# Supplementary Information for: High morphological differentiation in crown architecture contrasts with low population genetic structure of German Norway spruce stands

Oliver Caré <sup>1</sup>, Markus Müller <sup>1</sup>, Barbara Vornam <sup>1</sup>, Aki M. Höltken <sup>2</sup>, Karina Kahlert <sup>3</sup>, Konstantin V. Krutovsky <sup>1,4,5,6</sup>, Oliver Gailing <sup>1,\*</sup>, Ludger Leinemann <sup>1</sup>

<sup>1</sup> Department of Forest Genetics and Forest Tree Breeding, Büsgen-Institute, Faculty of Forest Sciences and Forest Ecology, Göttingen University, 37077 Göttingen, Germany

<sup>2</sup> Department of Forest Genetic Resources, Northwest German Forest Research Institute (NW-FVA) 34346 Hann. Münden, Germany

<sup>3</sup> Service and Competence Centre of Thüringen Forst, 99867 Gotha, Germany

<sup>4</sup> Department of Ecosystem Science and Management, Texas A&M University, College Station, TX 77840, USA

<sup>5</sup> Laboratory of population genetics, Vavilov Institute of General Genetics, Russian Academy of Sciences, 119991 Moscow, Russian Federation

<sup>6</sup> Genome Research and Education Centre, Siberian Federal University, Krasnoyarsk 660036, Russia

\* Correspondence: ogailin@gwdg.de

## Table of content:

|                                                                                                                                                                                                  |      |
|--------------------------------------------------------------------------------------------------------------------------------------------------------------------------------------------------|------|
| Table S1: Concentration ( $c_i$ ) of each forward and reverse primer in the multiplex reactions and single-plex.                                                                                 | p.2  |
| Table S2: Relative frequencies of assessed morphological traits in each stand corresponding.                                                                                                     | p.3  |
| Table S3: Hierarchical AMOVA based on the regional and population membership of the individuals.                                                                                                 | p.4  |
| Table S4: Pairwise $F_{ST}$ values between population pairs with corresponding p-values.                                                                                                         | p.5  |
| Table S5: Pairwise $G'_{ST}$ values between population pairs.                                                                                                                                    | p.5  |
| Figure S1 a-d: Overview map (a) and map sections of the stand locations (c-d).                                                                                                                   | p.6  |
| Figure S2: Schematic presentation of the three main crown architectural types                                                                                                                    | p.7  |
| Figure S3: Relationship of phenotypic divergence in a trait across populations ( $P_{ST}$ ) [over the ratio of $c/h^2$ ].                                                                        | p.8  |
| Figure S4: Corresponding p- value of the log likelihood ratio test on the deviation from HWE.                                                                                                    | p.9  |
| Figure S5: Estimation of the null allele frequency at each locus.                                                                                                                                | p.10 |
| Figure S6: Heatmaps of the standardized index of association $\bar{r}_d$ .                                                                                                                       | p.11 |
| Figure S7: Detection of outlier loci in LOSITAN.                                                                                                                                                 | p.12 |
| Figure S8: Directional relative migration network based on $G_{ST}$ .                                                                                                                            | p.13 |
| Figure S9 (a&d): Detection of the number of clusters $K$ : Delta $K$ , the b) log-likelihood probability of $K$ ( $L(K)$ ) and the corresponding c) first and d) second order change of $L(K)$ . | p.14 |
| Figure S10: Major modes of cluster results from $K$ 2 to 12.                                                                                                                                     | p.15 |

Table S1: Concentration ( $c_i$ ) of each forward and reverse primer in the multiplex reactions and single-plex.

| Singleplex   |                                        | Multiplex 1        |                                        | Multiplex 2     |                                        | Multiplex 3     |                                        | Multiplex 4        |                                        |
|--------------|----------------------------------------|--------------------|----------------------------------------|-----------------|----------------------------------------|-----------------|----------------------------------------|--------------------|----------------------------------------|
| SSR          | $c_i$<br>( $\mu\text{M}/\mu\text{l}$ ) | SSR                | $c_i$<br>( $\mu\text{M}/\mu\text{l}$ ) | SSR             | $c_i$<br>( $\mu\text{M}/\mu\text{l}$ ) | SSR             | $c_i$<br>( $\mu\text{M}/\mu\text{l}$ ) | SSR                | $c_i$<br>( $\mu\text{M}/\mu\text{l}$ ) |
| <i>PaGB8</i> | 3.57                                   | <i>WS00111.K13</i> | 3.57                                   | <i>SpAGC1</i>   | 2.14                                   | <i>EATC1E03</i> | 1.25                                   | <i>SpAGG2</i>      | 1.79                                   |
|              |                                        | <i>EATC1D2</i>     | 2.14                                   | <i>EATC2G05</i> | 2.14                                   | <i>SpAG2</i>    | 1.79                                   | <i>WS00016.O09</i> | 3.57                                   |
|              |                                        |                    |                                        | <i>EATC1B2</i>  | 1.07                                   | <i>SpAC1F07</i> | 3.57                                   | <i>PaGB3</i>       | 1.07                                   |

Table S2: Relative frequencies of assessed morphological traits in each stand corresponding to the Figure 1 in the main paper. Stand abbreviation: LE: Low elevation type; HE: High elevation type; SBF: relict stand "Schlossbergfichte"; S: Ore Mountains (Saxony); Thy: Thuringia; H: Harz Mountains.

|                   |              | HE_H  | LE_H  | HE_S  | LE_S  | SBF_Thy | HE_Thy | LE_Thy |
|-------------------|--------------|-------|-------|-------|-------|---------|--------|--------|
| crown shape       | narrow       | 0.374 | 0.005 | 0.565 | 0.030 | 1.000   | 0.545  | 0.000  |
|                   | intermediate | 0.626 | 0.315 | 0.375 | 0.730 | 0.000   | 0.455  | 0.035  |
|                   | broad        | 0.000 | 0.680 | 0.060 | 0.240 | 0.000   | 0.000  | 0.965  |
| branching anle    | downwards    | 0.865 | 0.025 | 0.655 | 0.065 | 1.000   | 0.555  | 0.000  |
|                   | intermediate | 0.135 | 0.430 | 0.345 | 0.660 | 0.000   | 0.445  | 0.175  |
|                   | upwards      | 0.000 | 0.545 | 0.000 | 0.275 | 0.000   | 0.000  | 0.825  |
| branching pattern | plate        | 0.730 | 0.000 | 0.365 | 0.025 | 1.000   | 0.545  | 0.000  |
|                   | intermediate | 0.207 | 0.400 | 0.625 | 0.485 | 0.000   | 0.455  | 0.355  |
|                   | comb         | 0.063 | 0.600 | 0.010 | 0.490 | 0.000   | 0.000  | 0.645  |
| crown damage      | no           | 0.000 | 0.060 | 0.915 | 0.955 | 1.000   | 1.000  | 0.000  |
|                   | yes          | 1.000 | 0.940 | 0.085 | 0.045 | 0.000   | 0.000  | 1.000  |
| forking           | no           | 0.000 | 0.665 | 0.960 | 0.970 | 1.000   | 1.000  | 0.460  |
|                   | yes          | 1.000 | 0.335 | 0.040 | 0.030 | 0.000   | 0.000  | 0.540  |

All values are rounded to three decimals.

Table S3: Hierarchical AMOVA based on the regional and population membership of the individuals.

| Source of variation                  | d.f. | Sum of squares | Variance component | Percentage variation | P-value |
|--------------------------------------|------|----------------|--------------------|----------------------|---------|
| Among regions                        | 2    | 30.1           | 0.00945            | 0.24                 | 0.05833 |
| Among populations within regions     | 4    | 26.5           | 0.00642            | 0.16                 | <0.0002 |
| Among individuals within populations | 1290 | 5618.7         | 0.37536            | 9.39                 | <0.0002 |
| Within individuals                   | 1297 | 4675.5         | 3.60486            | 90.21                | <0.0002 |
| Total                                | 2593 | 10350.7        | 3.99608            |                      |         |

Significance of the (co-) variance components based on 5000 permutations, both calculated in Arlequin 3.5.2.2 [76].

Table S4: Pairwise  $F_{ST}$  values between population pairs (bolt) with corresponding p-values from 10000 permutations in GenAlEx 6.5 [77].

|         | HE_H                  | HE_S                  | HE_Thy                | LE_H                  | LE_S                  | LE_Thy                |
|---------|-----------------------|-----------------------|-----------------------|-----------------------|-----------------------|-----------------------|
| HE_S    | <b>0.004</b><br>0.000 |                       |                       |                       |                       |                       |
| HE_Thy  | <b>0.004</b><br>0.000 | <b>0.003</b><br>0.000 |                       |                       |                       |                       |
| LE_H    | <b>0.002</b><br>0.153 | <b>0.004</b><br>0.000 | <b>0.004</b><br>0.000 |                       |                       |                       |
| LE_S    | <b>0.003</b><br>0.000 | <b>0.002</b><br>0.000 | <b>0.003</b><br>0.000 | <b>0.004</b><br>0.000 |                       |                       |
| LE_Thy  | <b>0.003</b><br>0.000 | <b>0.002</b><br>0.003 | <b>0.003</b><br>0.000 | <b>0.004</b><br>0.000 | <b>0.002</b><br>0.059 |                       |
| SBF_Thy | <b>0.006</b><br>0.000 | <b>0.005</b><br>0.001 | <b>0.003</b><br>0.028 | <b>0.007</b><br>0.000 | <b>0.005</b><br>0.000 | <b>0.004</b><br>0.001 |

Table S5: Pairwise  $G'_{ST}$  values between population pairs in GenAlEx 6.5 [77].

|         | HE_H  | HE_S  | HE_Thy | LE_H  | LE_S  | LE_Thy |
|---------|-------|-------|--------|-------|-------|--------|
| HE_S    | 0.024 |       |        |       |       |        |
| HE_Thy  | 0.021 | 0.009 |        |       |       |        |
| LE_H    | 0.002 | 0.022 | 0.022  |       |       |        |
| LE_S    | 0.011 | 0.008 | 0.010  | 0.016 |       |        |
| LE_Thy  | 0.016 | 0.007 | 0.009  | 0.022 | 0.003 |        |
| SBF_Thy | 0.026 | 0.016 | 0.008  | 0.030 | 0.017 | 0.014  |

$p$ -values are identical to Table S4 and therefore not given.

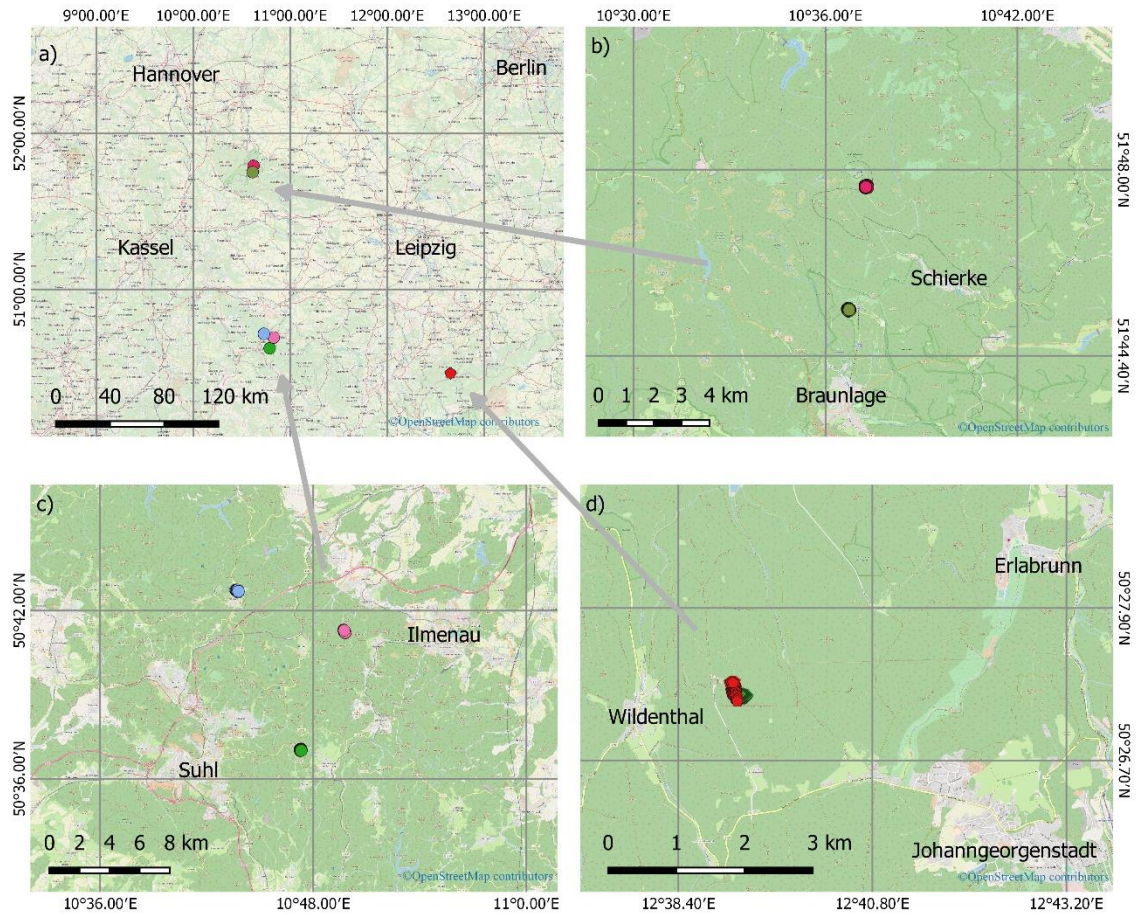

Figure S1 a-d: Overview map (a) and map sections of the stand locations. Harz region (b) with the northern high elevation (HE) and southern low elevation (LE) stand. Thuringian forest (c) with the northern relict stand "Schlossbergfichte", the southern LE stand and the more eastern HE stands. Ore mountains in Saxony (d) with the western HE stand and eastern LE stand. Longitudinal and latitudinal coordinates are given on the corresponding sides of each map. Maps generated with QGIS 2.18.15 [132] using geodata from [www.openstreetmaps.org](http://www.openstreetmaps.org)[133].

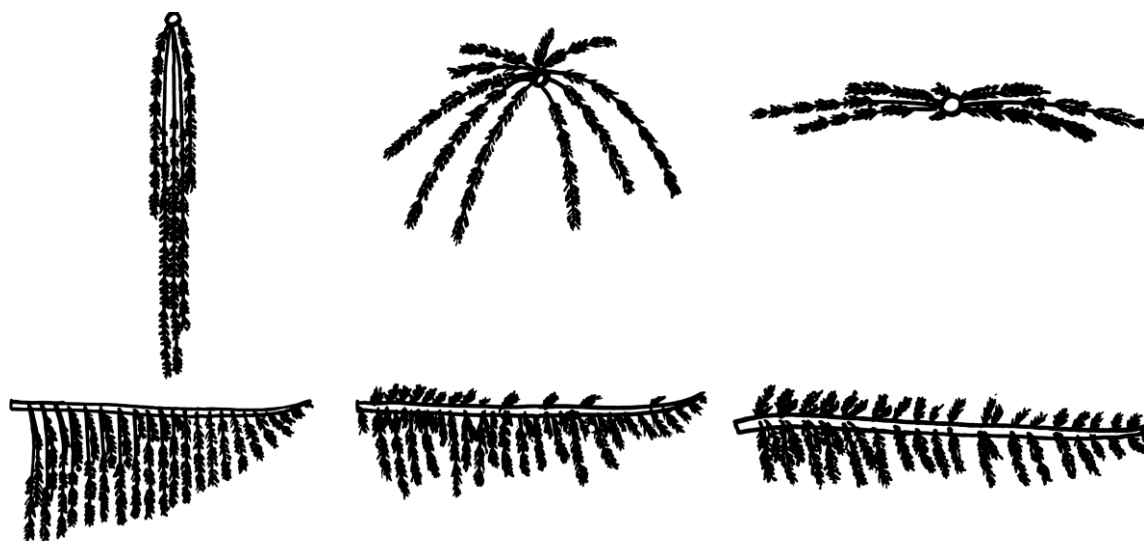

Figure S2: Schematic presentation of the three main crown architectural types. From left to right, lowland combe type, intermediate brush type and narrow high elevation plate type. Top secondary branching pattern as cross-sectional view and bottom in side view (Figures modified and reproduced with permission from J. D. Sauerländer's Verlag; Gruber, *Allg. Forst- u. J.-Ztg*, **160**, published by J. D. Sauerländer's Verlag, 1989 [5]).

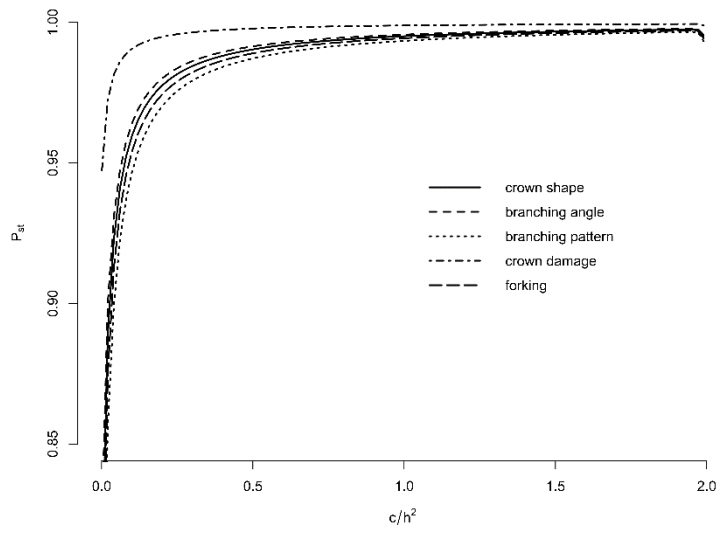

Figure S3: Relationship of phenotypic divergence in a trait across populations ( $P_{st}$ ) [60-62] over the ratio of the total variance explained by additive genetic effects across populations and the narrow sense heritability ( $c/h^2$ )



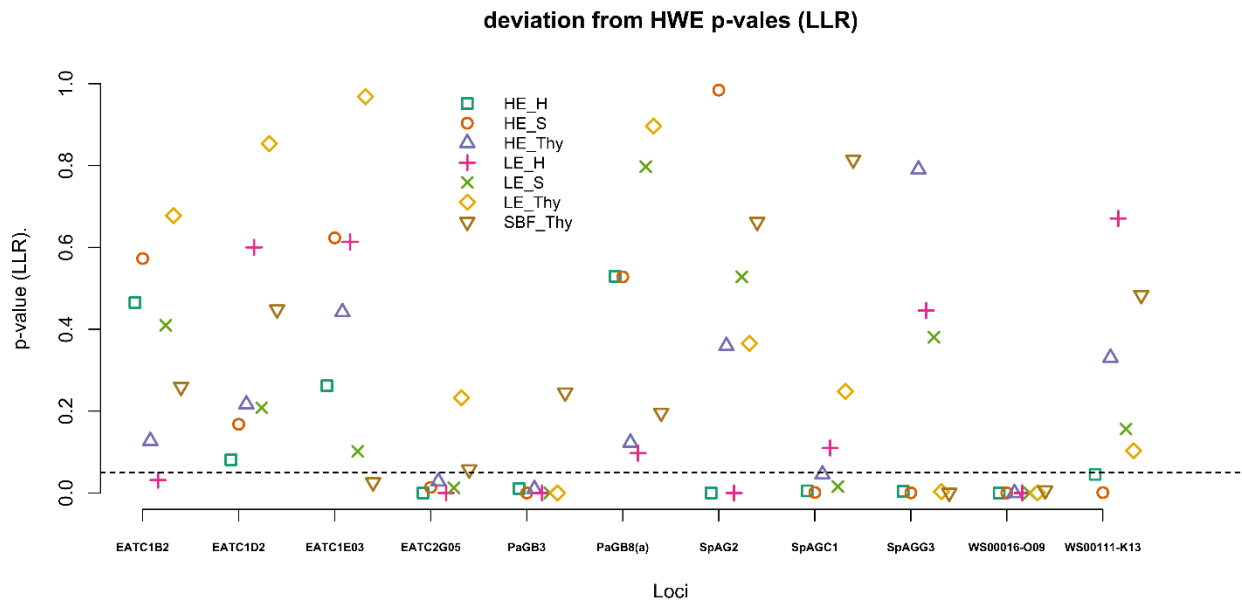

Figure S4: Corresponding p-value of the log likelihood ratio test on the deviation from HWE of each locus genotyped in each population sampled. Test statistic is based on either full enumeration or Monte Carlo sampling on the count tables depended on the number of tables to be observe (for details see [67,68]).

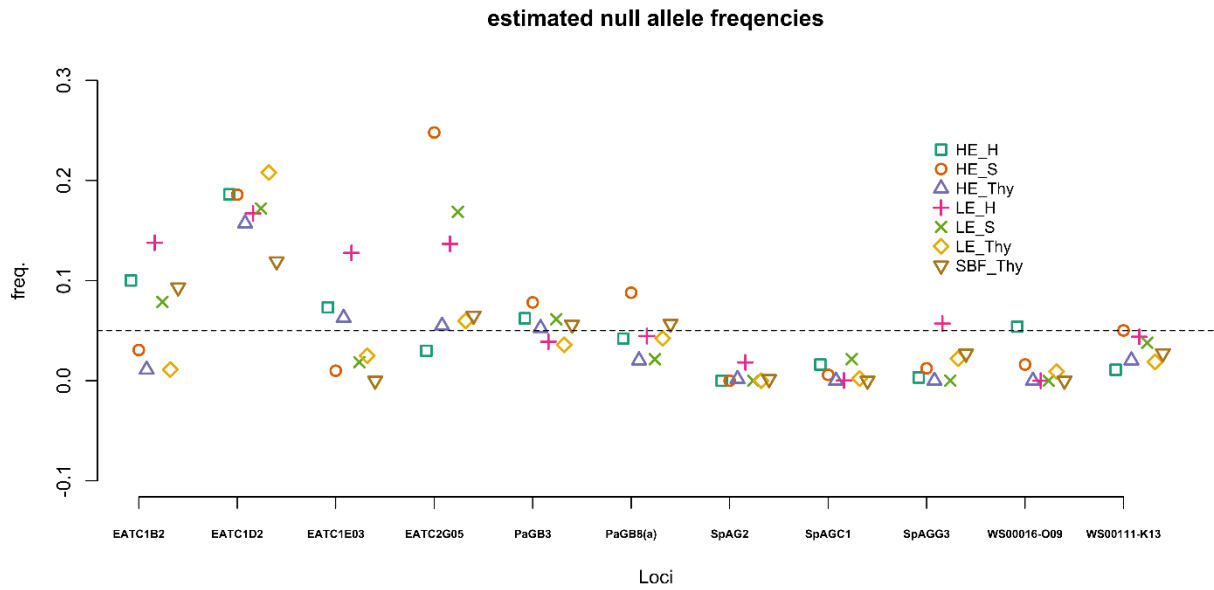

Figure S5: Estimation of the null allele frequency at each locus in each population separately. Average of maximum likelihood estimation expectation maximisation [71] in genepop [72] and ML estimation in ML-Nullfreq [73]. Dashed line indicating the estimated 5% frequency, as it can be seen as a threshold value for reporting null alleles [74].

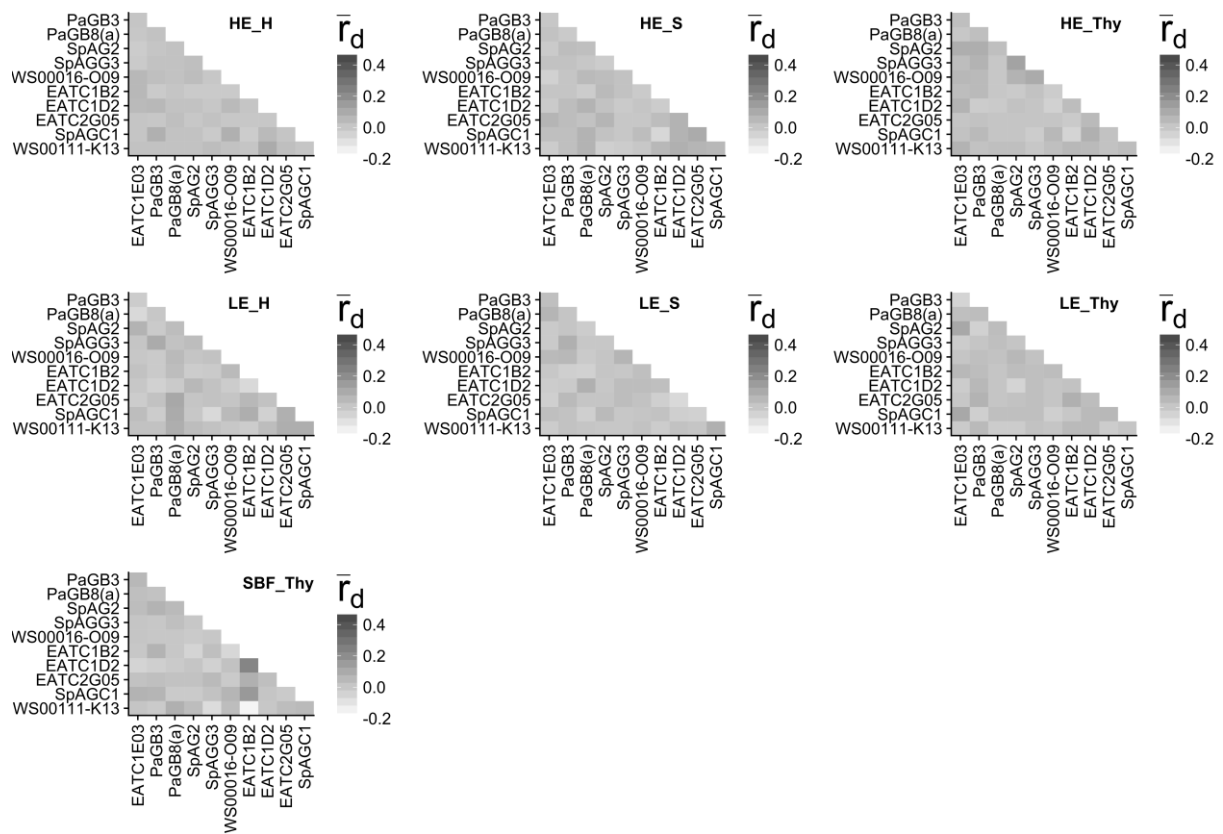

Figure S6: Heatmaps displaying the standardized index of association  $\bar{r}_d$  [69] for pairwise loci comparison for each stand separately. Low values are indicated in white, whereas higher values are indicated with increasing grey shades. Stand abbreviation: LE: Low elevation type; HE: High elevation type; SBF: relict stand “Schlossbergfichte”; S: Ore Mountains (Saxony); Thy: Thuringia; H: Harz Mountains.

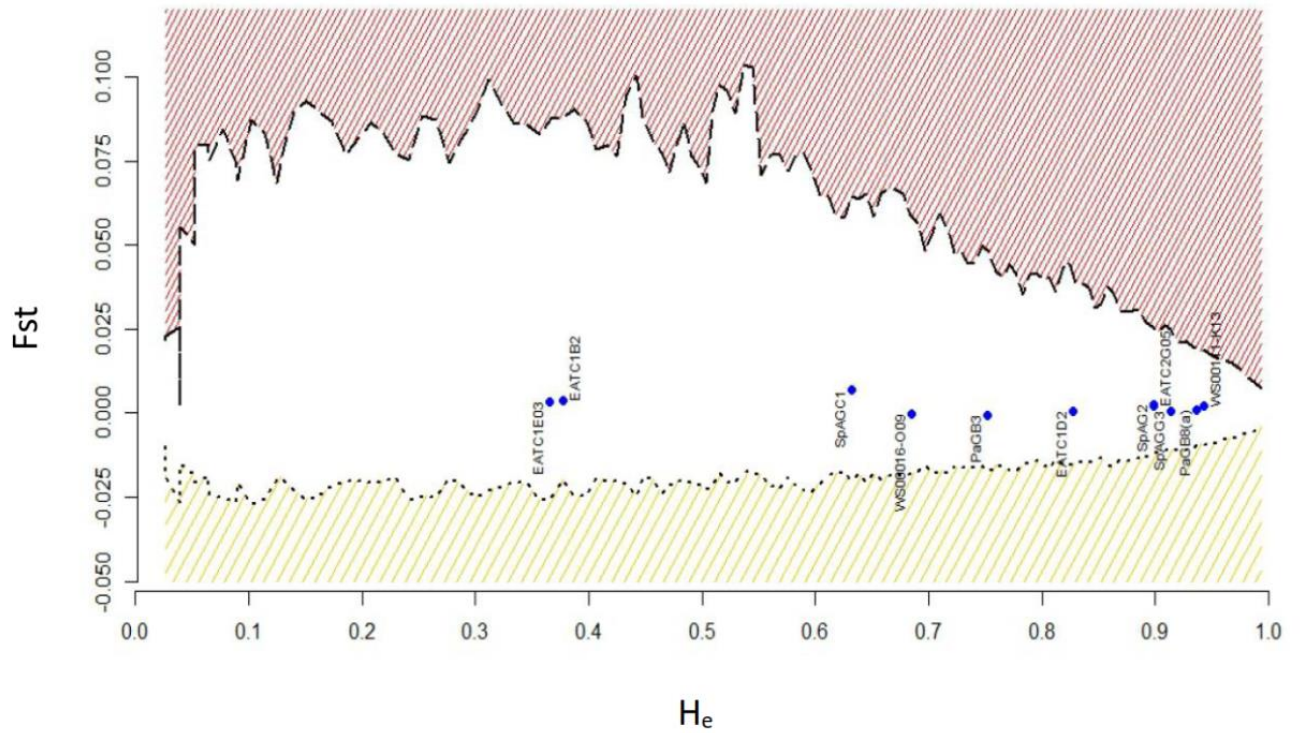

Figure S7: Detection of outlier loci in LOSITAN [82] exploring the relationship between  $F_{ST}$  and  $H_e$  among populations by permutations. Black dashed lines indicate the upper 95% confidence limit, also highlighted by fine red hatching. Black dotted lines indicate the lower 95% confidence limit, highlighted by rougher yellow hatching.

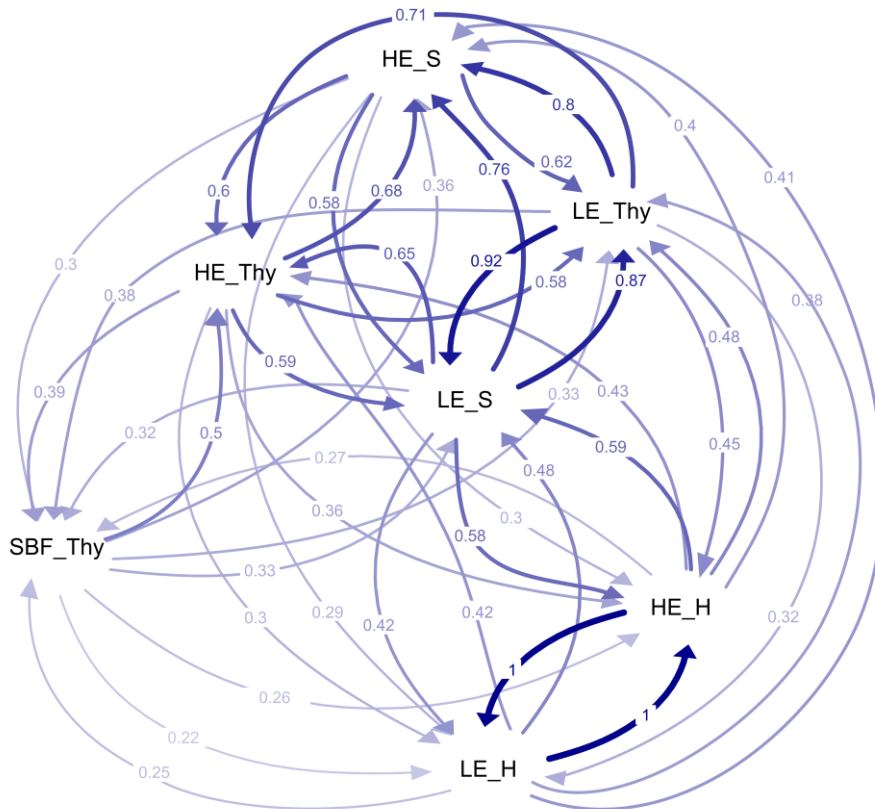

Figure S8: Directional relative migration network [85] based on  $G_{ST}$  [86] of potential allochthones and autochthones populations. The relative positions of the populations indicate relatedness from the perspective of hypothetical gene flow. Numbers and arrows indicate the direction and extent of gene flow (also underlined by arrow shading/thickness). Stand abbreviations: LE: Low elevation type; HE: High elevation type; SBF: relict stand "Schlossbergfichte"; S: Ore Mountains (Saxony); Thy: Thuringia; H: Harz Mountains.

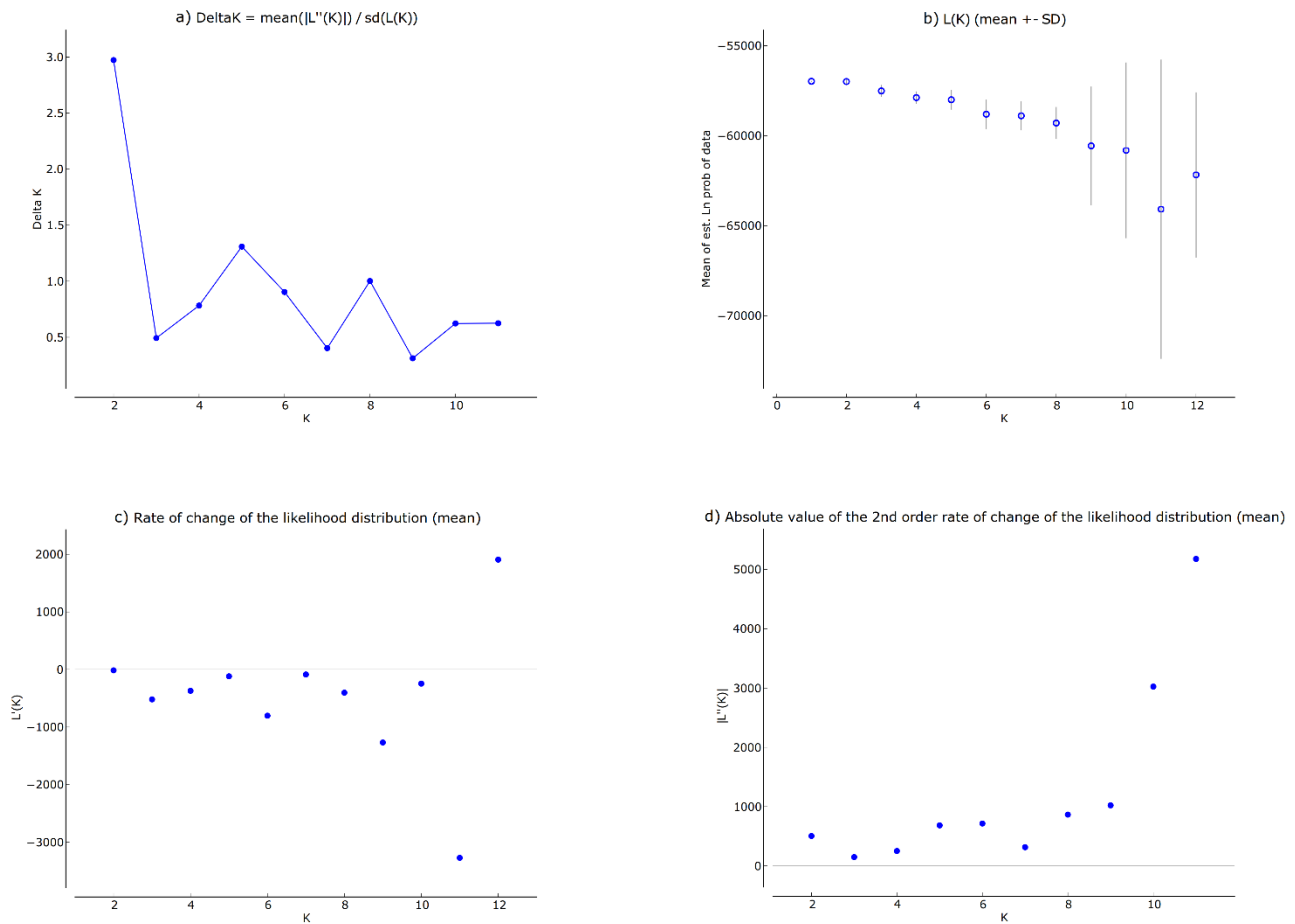

Figure S9 (a-d): Detection of the number of clusters  $K$  according to a) DeltaK [101], the b) log-likelihood probability of  $K$  ( $L(K)$ ) and the corresponding c) first and d) second order change of  $L(K)$  [96] calculated in STRUCTURE HARVESTER [102].

## Major modes

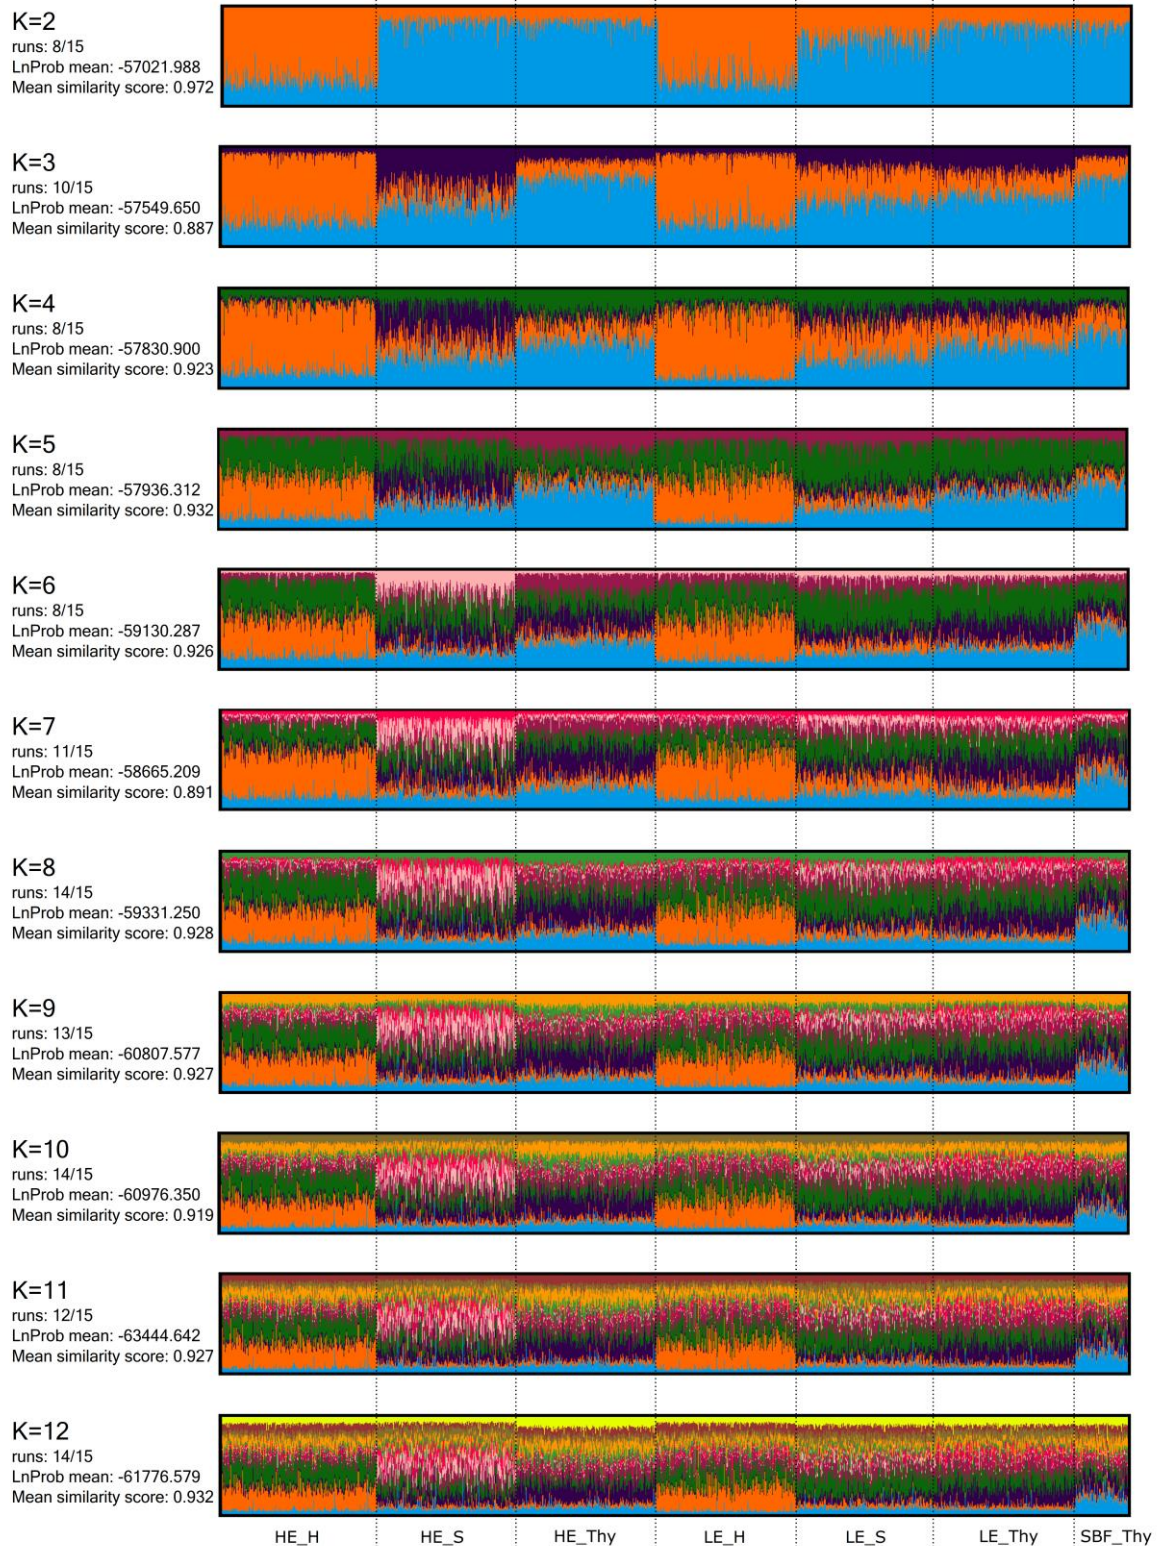

Figure S10: Major modes of cluster results from K 2 to 12 of STRUCTURE [96] analysis summarised in CLUMPAK [100]. For each K the major mode is given indication the number of runs and der mean similarity of the summarisation output as well as the mean ln probability of the mode. Individuals ordered by population membership as indicated at the bottom.
